# Supplementary material
Source: MDPI journal article supplement (https://www.mdpi.com/1424-8247/16/2/258)
Supplement: s1 [file s1]

#### Inflammation-induced by carrageenan

It was performed as previously described Using a subcutaneous (SC) injection of 0.2 ml of carrageenan solution (1%w/v dissolved in sterile saline), the inflammation was induced in the sub-planter right hind paw. We used the left hind paw as a control as it wasn't injected with carrageenan.

Table S1. The sequences of the utilized primers.

| Gene         | Sequence                                                                         |
|--------------|----------------------------------------------------------------------------------|
| Beta actin   | Forward 5'-GTCAGGTCATCACTATCGGCAAT-3'<br>Reverse 5'- AGAGGTCTTTACGGATGTCAACGT-3' |
| IL-1 $\beta$ | Forward 5'-CACCTCTCAAGCAGAGCACAG-3'<br>Reverse 5'-GGGTTCCATGGTGAAGTCAAC-3'       |
| IL-6         | Forward 5'-GCCCTTCAGGAACAGCTATGA-3'<br>Reverse 5'-TGTCAACAACATCAGTCCCAAGA-3'     |

|                                | Size (d.nm):         | % Intensity: | St Dev (d.nm): |
|--------------------------------|----------------------|--------------|----------------|
| <b>Z-Average (d.nm):</b> 589.8 | <b>Peak 1:</b> 521.5 | 100.0        | 124.7          |
| <b>Pdl:</b> 0.283              | <b>Peak 2:</b> 0.000 | 0.0          | 0.000          |
| <b>Intercept:</b> 0.896        | <b>Peak 3:</b> 0.000 | 0.0          | 0.000          |

**Result quality :** Good

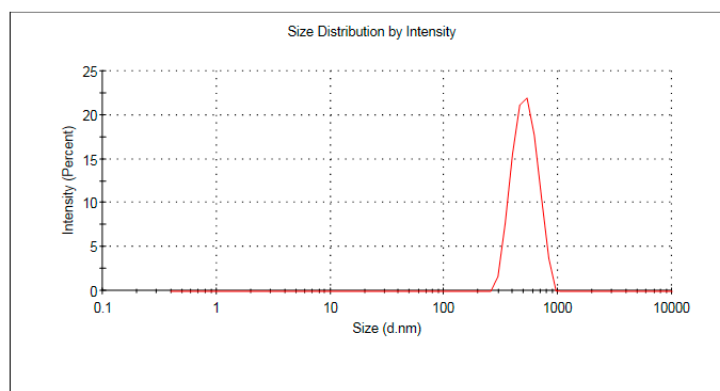

|                                | Size (d.nm):         | % Intensity: | St Dev (d.nm): |
|--------------------------------|----------------------|--------------|----------------|
| <b>Z-Average (d.nm):</b> 573.9 | <b>Peak 1:</b> 527.1 | 98.6         | 132.3          |
| <b>Pdl:</b> 0.246              | <b>Peak 2:</b> 5494  | 1.4          | 213.4          |
| <b>Intercept:</b> 0.891        | <b>Peak 3:</b> 0.000 | 0.0          | 0.000          |

**Result quality :** Good

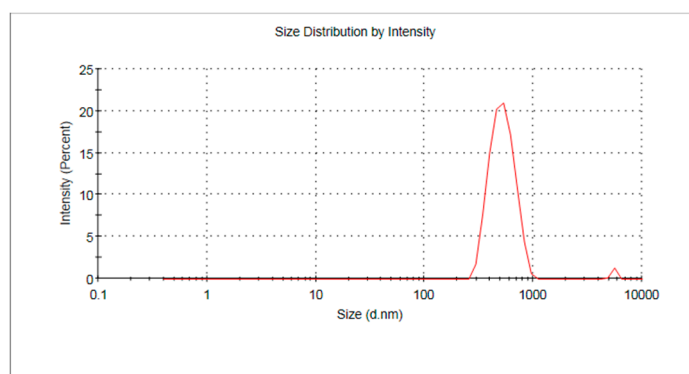

|                                | Size (d.nm):         | % Intensity: | St Dev (d.nm): |
|--------------------------------|----------------------|--------------|----------------|
| <b>Z-Average (d.nm):</b> 442.3 | <b>Peak 1:</b> 179.6 | 84.4         | 23.64          |
| <b>Pdl:</b> 0.798              | <b>Peak 2:</b> 16.55 | 15.6         | 2.393          |
| <b>Intercept:</b> 0.999        | <b>Peak 3:</b> 0.000 | 0.0          | 0.000          |

**Result quality :** Refer to quality report

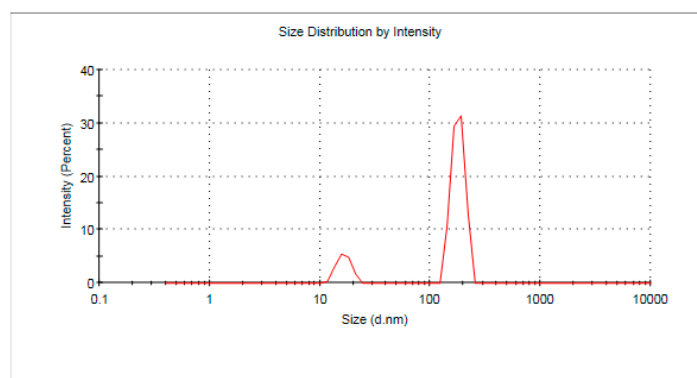

Figure S1. Malvern's Zetasizer graphs showing multiple measurements of particle size of CXB-GLR-PVP.

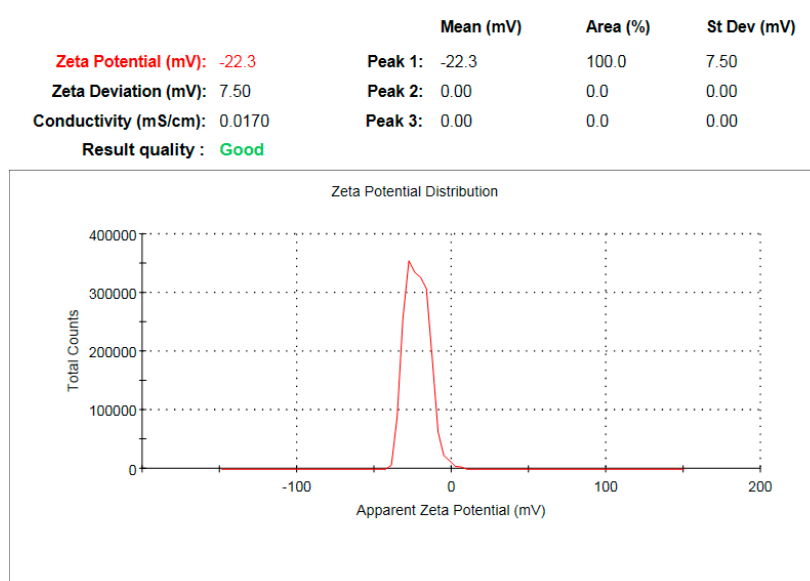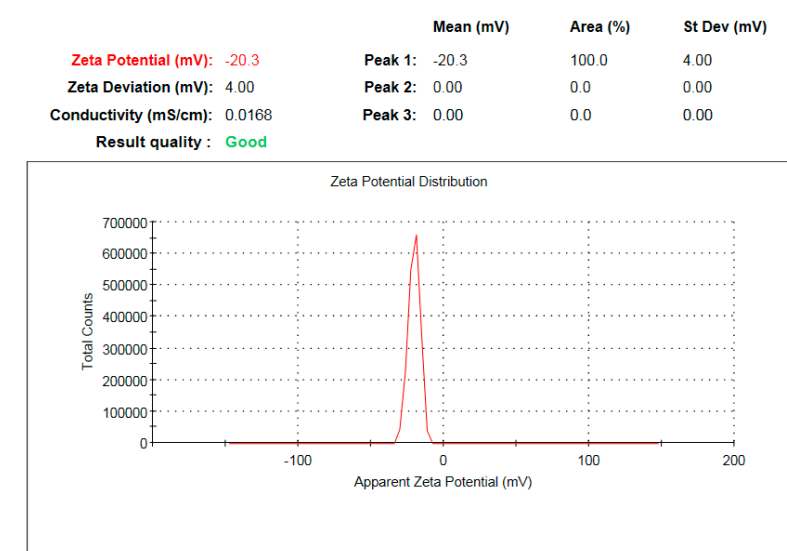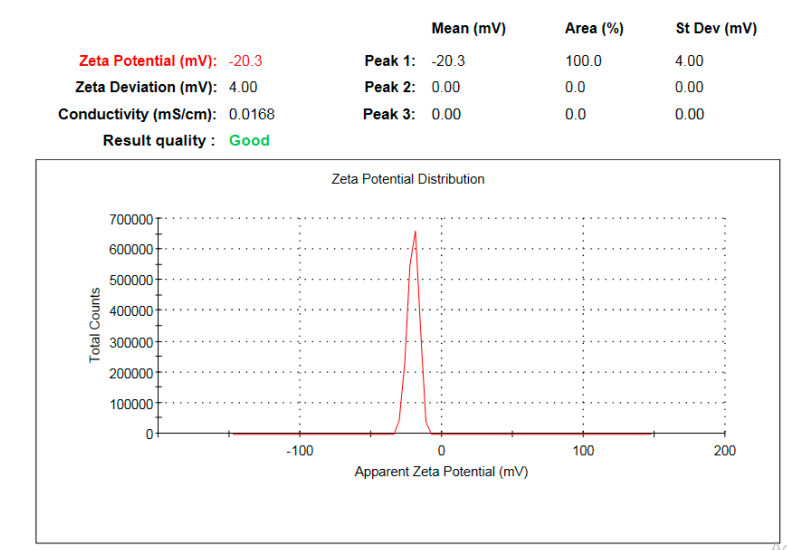

Figure S2. Malvern's Zetasizer graphs showing multiple measurements of  $\zeta$ -potential of CXB-GLR-PVP.
